# Supplementary material for: Routine monitoring of western Lake Erie to track water quality changes associated with cyanobacterial harmful algal blooms
Source: Copernicus journal article supplement (doi:10.5194/essd-2023-62), 2023-03-29
Supplement: Supplementary file 1 [file essd-2023-62-supplement.pdf]

# Supplementary Information

Routine monitoring of Western Lake Erie to track water quality changes associated with cyanobacterial harmful algal blooms

## **Authors:**

Anna G Boegehold

Cooperative Institute for Great Lakes Research (CIGLR), University of Michigan, 4840 South State Road, Ann Arbor, MI 48108 USA

[annaboeg@umich.edu](mailto:annaboeg@umich.edu)

ORCID: 0000-0002-9718-9895

Ashley M. Burtner

Cooperative Institute for Great Lakes Research (CIGLR), University of Michigan, 4840 South State Road, Ann Arbor, MI 48108 USA

[aburtner@umich.edu](mailto:aburtner@umich.edu)

Andrew C Camilleri

Cooperative Institute for Great Lakes Research (CIGLR), University of Michigan, 4840 South State Road, Ann Arbor, MI 48108 USA

[accamill@umich.edu](mailto:accamill@umich.edu)

Glenn Carter – CIGLR

Cooperative Institute for Great Lakes Research (CIGLR), University of Michigan, 4840 South State Road, Ann Arbor, MI 48108 USA

[carterg@umich.edu](mailto:carterg@umich.edu)

Paul DenUyl

Cooperative Institute for Great Lakes Research (CIGLR), University of Michigan, 4840 South State Road, Ann Arbor, MI 48108 USA

[pdenuyl@umich.edu](mailto:pdenuyl@umich.edu)

ORCID: 0000-0003-3328-3476

David Fanslow

NOAA Great Lakes Environmental Research Laboratory, 4840 South State Road, Ann Arbor, MI 48108, USA

[fanslowdl@gmail.com](mailto:fanslowdl@gmail.com)

Deanna Fyffe Semenyuk, Cooperative Institute for Great Lakes Research (CIGLR), University of Michigan, 4840 South State Road, Ann Arbor, MI 48108 and Jacobs, 1999 Bryan Street, Suite 1200, Dallas, TX, 75201, [deanna.fyffe@jacobs.com](mailto:deanna.fyffe@jacobs.com)

Casey M Godwin

Cooperative Institute for Great Lakes Research (CIGLR), University of Michigan, 4840 South State Road, Ann Arbor, MI 48108 USA

[cgodwin@umich.edu](mailto:cgodwin@umich.edu)

Duane Gossiaux

NOAA Great Lakes Environmental Research Laboratory, 4840 South State Road, Ann Arbor, MI 48108, USA

[duane.gossiaux@noaa.gov](mailto:duane.gossiaux@noaa.gov)

Thomas H Johengen

Cooperative Institute for Great Lakes Research (CI GLR), University of Michigan, 4840 South State Road, Ann Arbor, MI 48108 USA

[johengen@umich.edu](mailto:johengen@umich.edu)

Holly Kelchner

Cooperative Institute for Great Lakes Research (CI GLR), University of Michigan, 4840 South State Road, Ann Arbor, MI 48108 USA

[hkelch@umich.edu](mailto:hkelch@umich.edu)

Christine Kitchens

Cooperative Institute for Great Lakes Research (CI GLR), University of Michigan, 4840 South State Road, Ann Arbor, MI 48108 USA

[chknightl@umich.edu](mailto:chknightl@umich.edu)

ORCID: 0000-0002-8547-5704

Lacey A. Mason

NOAA Great Lakes Environmental Research Laboratory, 4840 South State Road, Ann Arbor, MI 48108 USA

[lacey.mason@noaa.gov](mailto:lacey.mason@noaa.gov)

ORCID: 0000-0003-1541-3134

Kelly McCabe

Cooperative Institute for Great Lakes Research (CI GLR), University of Michigan, 4840 South State Road, Ann Arbor, MI 48108 USA

[mccabekm@umich.edu](mailto:mccabekm@umich.edu)

Danna Palladino

NOAA Great Lakes Environmental Research Laboratory, 4840 South State Road, Ann Arbor, MI 48108

[danna.palladino@noaa.gov](mailto:danna.palladino@noaa.gov)

ORCID: 0000-0003-4840-3493

Dack Stuart

Woods Hole Group, Inc., 107 Waterhouse Road, Bourne, MA 02532,

[dstuart@woodsholegroup.com](mailto:dstuart@woodsholegroup.com)

ORCID: 0000-0002-3796-081X

Henry Vanderploeg

NOAA Great Lakes Environmental Research Laboratory, 4840 South State Road, Ann Arbor, MI 48108

[henry.vanderploeg@noaa.gov](mailto:henry.vanderploeg@noaa.gov)

ORCID: 0000-0003-1358-8475

Reagan Errera

NOAA Great Lakes Environmental Research Laboratory, 4840 South State Road, Ann Arbor, MI 48108, USA

[reagan.errera@noaa.gov](mailto:reagan.errera@noaa.gov)

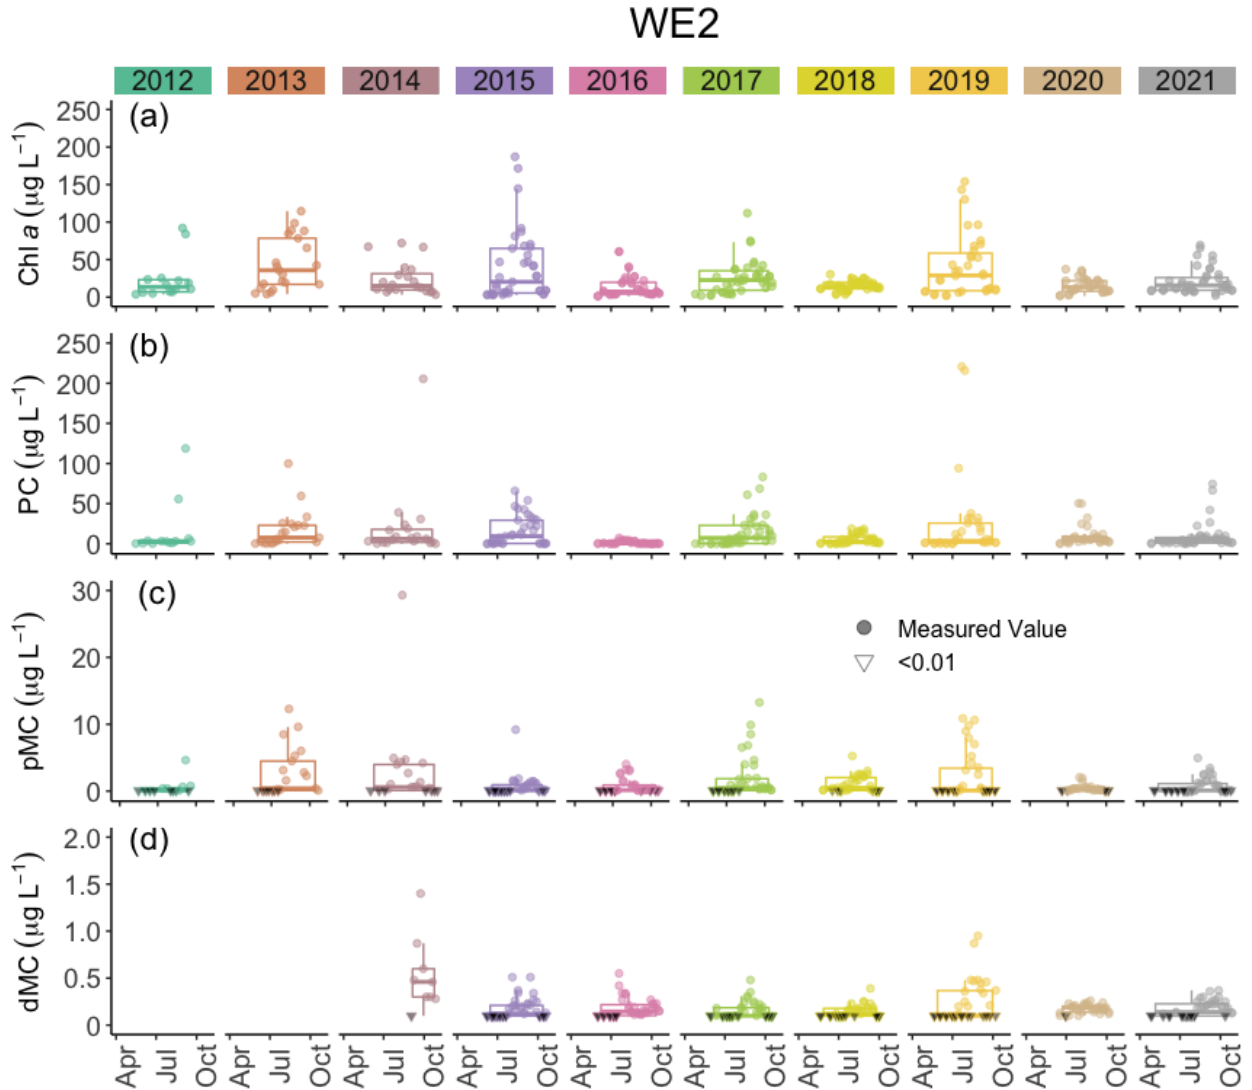

Figure S1. Concentrations of chlorophyll *a* (Chl *a*), phycocyanin (PC), particulate microcystins (pMC), and dissolved microcystins (dMC) at Station WE02 for all years sampled. Boxplots represent the median and 25% and 75% quartiles with whiskers extending to the highest or lowest point within 1.5x the interquartile range. A scatterplot is overlaid on the boxplots.

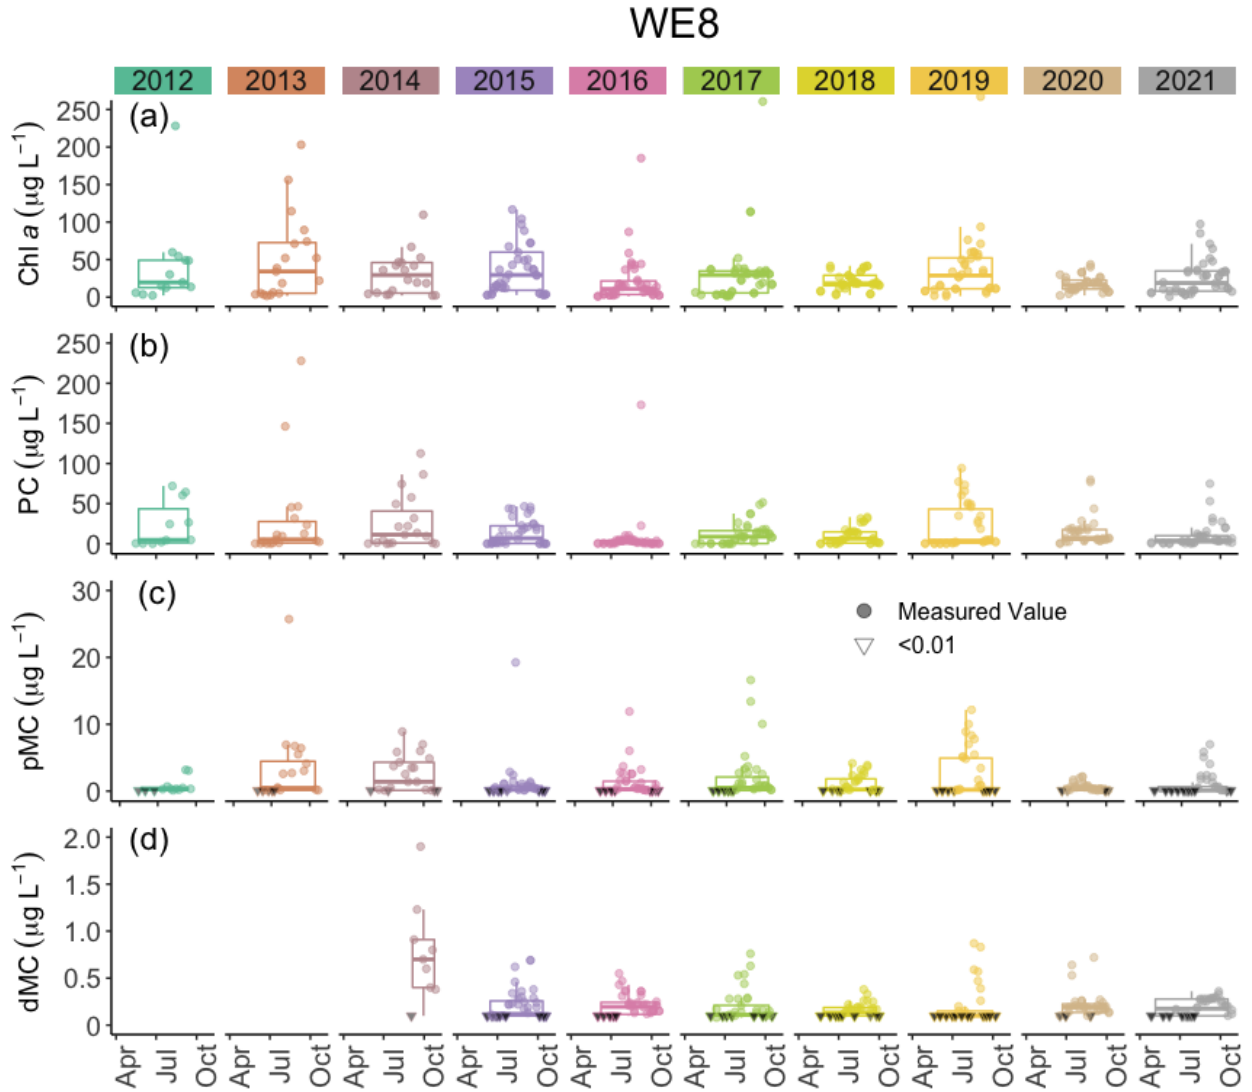

Figure S2. Concentrations of chlorophyll a (Chl a), phycocyanin (PC), particulate microcystins (pMC), and dissolved microcystins (dMC) at Station WE08 for all years sampled. Boxplots represent the median and 25% and 75% quartiles with whiskers extending to the highest or lowest point within 1.5x the interquartile range. A scatterplot is overlaid on the boxplots.

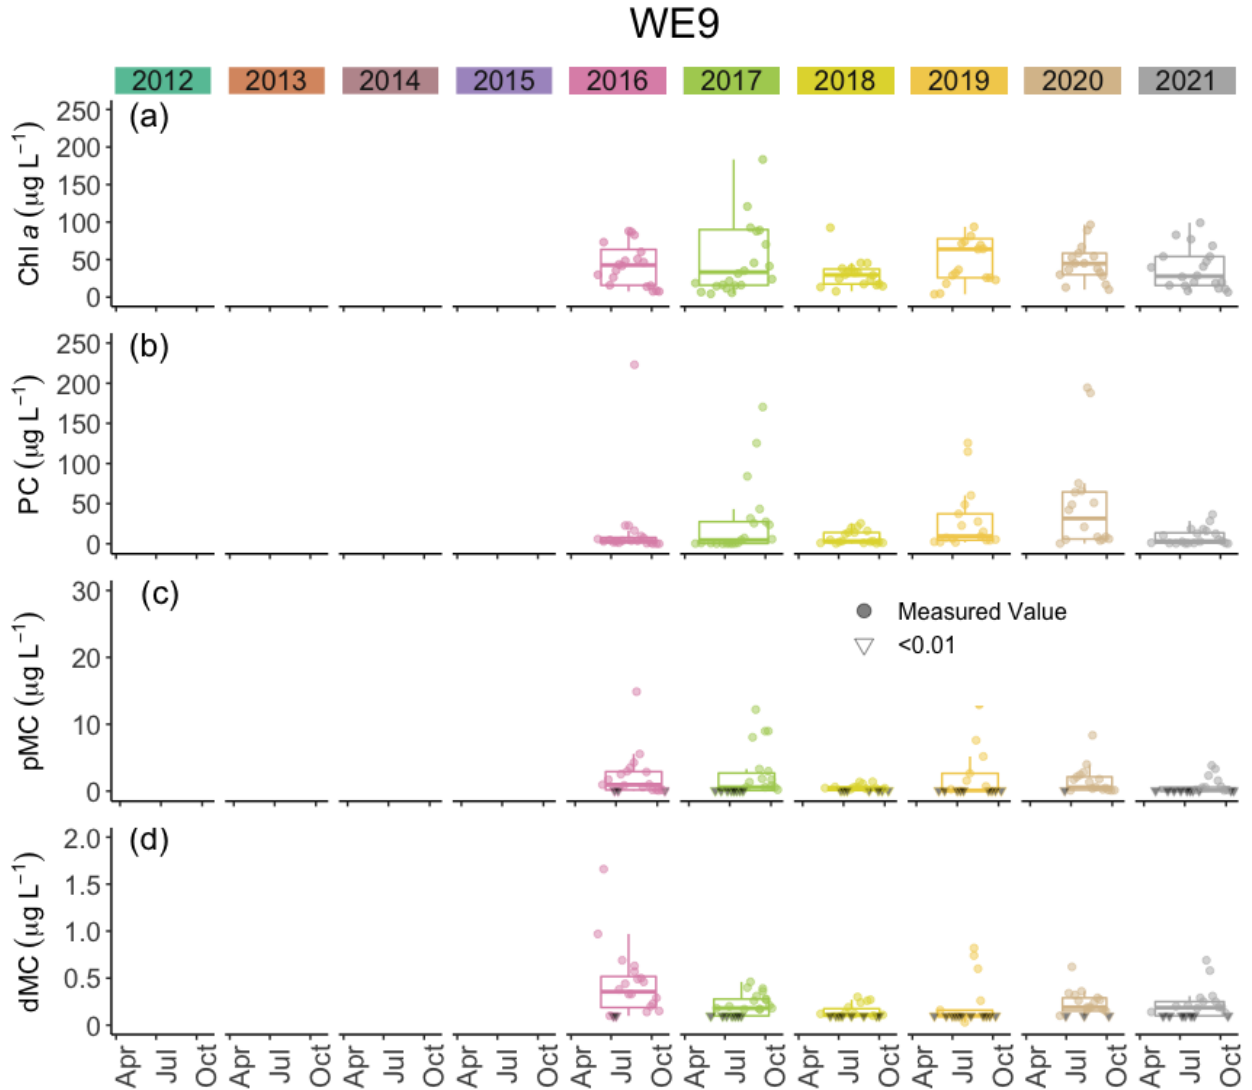

Figure S3. Concentrations of chlorophyll a (Chl a), phycocyanin (PC), particulate microcystins (pMC), and dissolved microcystins (dMC) at Station WE09 for all years sampled. Boxplots represent the median and 25% and 75% quartiles with whiskers extending to the highest or lowest point within 1.5x the interquartile range. A scatterplot is overlaid on the boxplots.

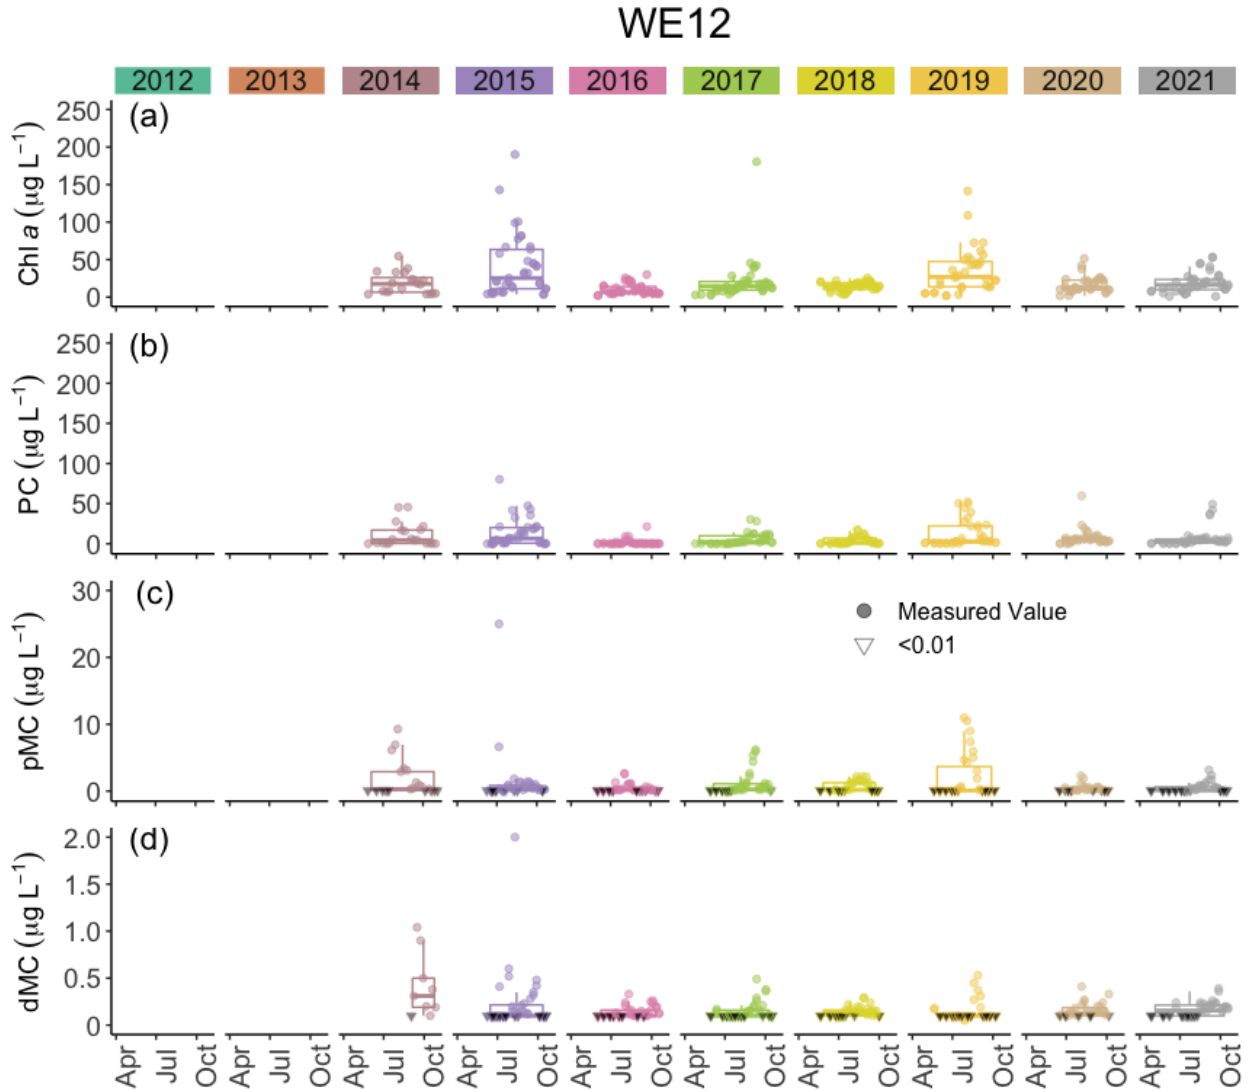

Figure S4. Concentrations of chlorophyll a (Chl a), phycocyanin (PC), particulate microcystins (pMC), and dissolved microcystins (dMC) at Station WE12 for all years sampled. Boxplots represent the median and 25% and 75% quartiles with whiskers extending to the highest or lowest point within 1.5x the interquartile range. A scatterplot is overlaid on the boxplots.

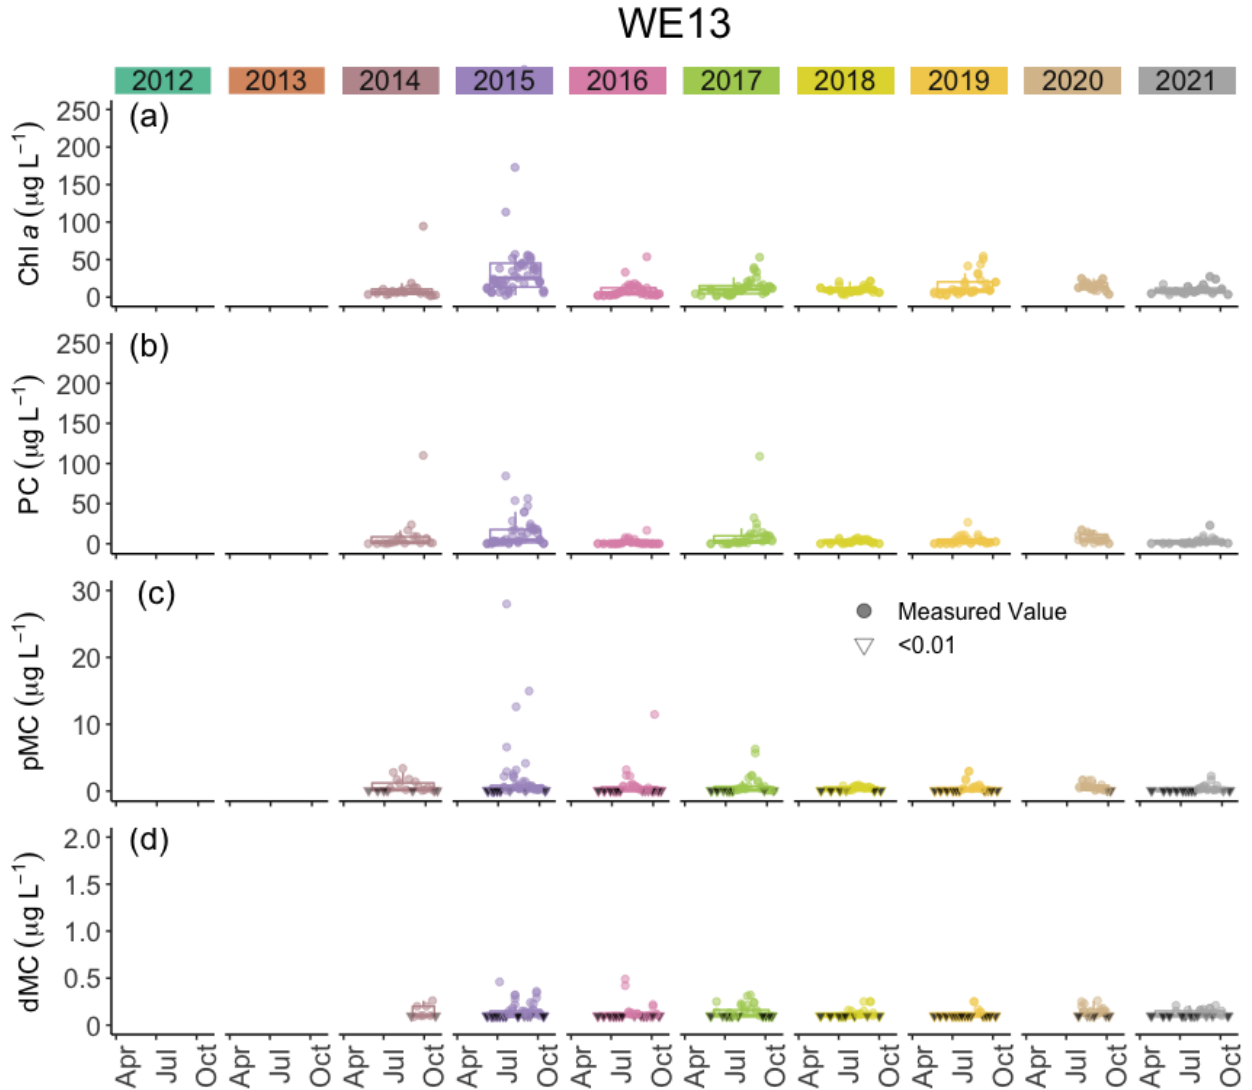

Figure S5. Concentrations of chlorophyll a (Chl a), phycocyanin (PC), particulate microcystins (pMC), and dissolved microcystins (dMC) at Station WE13 for all years sampled. Boxplots represent the median and 25% and 75% quartiles with whiskers extending to the highest or lowest point within 1.5x the interquartile range. A scatterplot is overlaid on the boxplots.



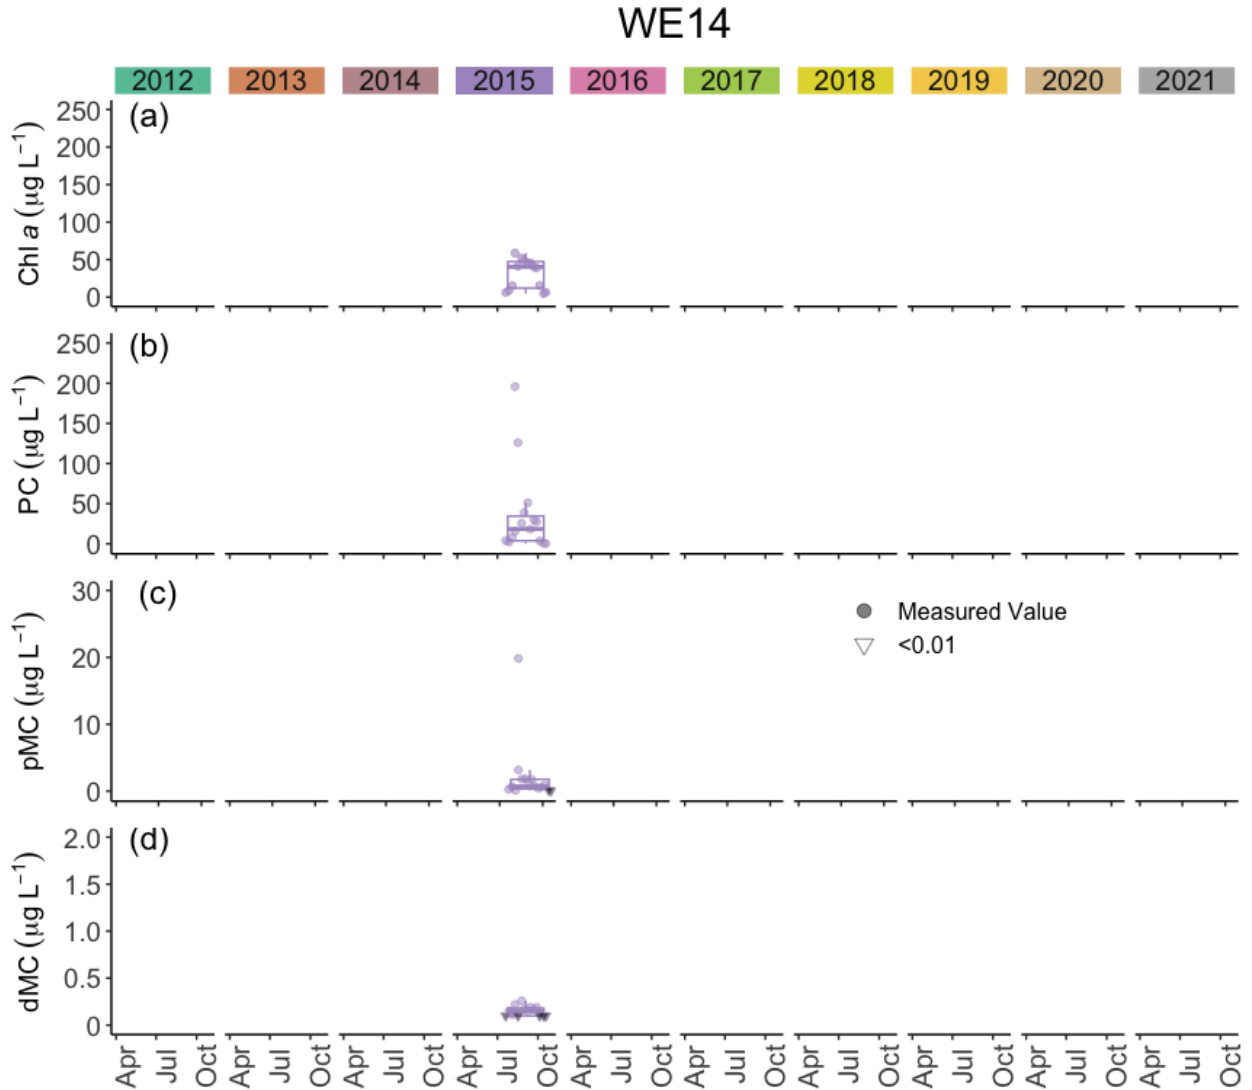

Figure S6. Concentrations of chlorophyll a (Chl a), phycocyanin (PC), particulate microcystins (pMC), and dissolved microcystins (dMC) at Station WE14 for all years sampled. Boxplots represent the median and 25% and 75% quartiles with whiskers extending to the highest or lowest point within 1.5x the interquartile range. A scatterplot is overlaid on the boxplots.

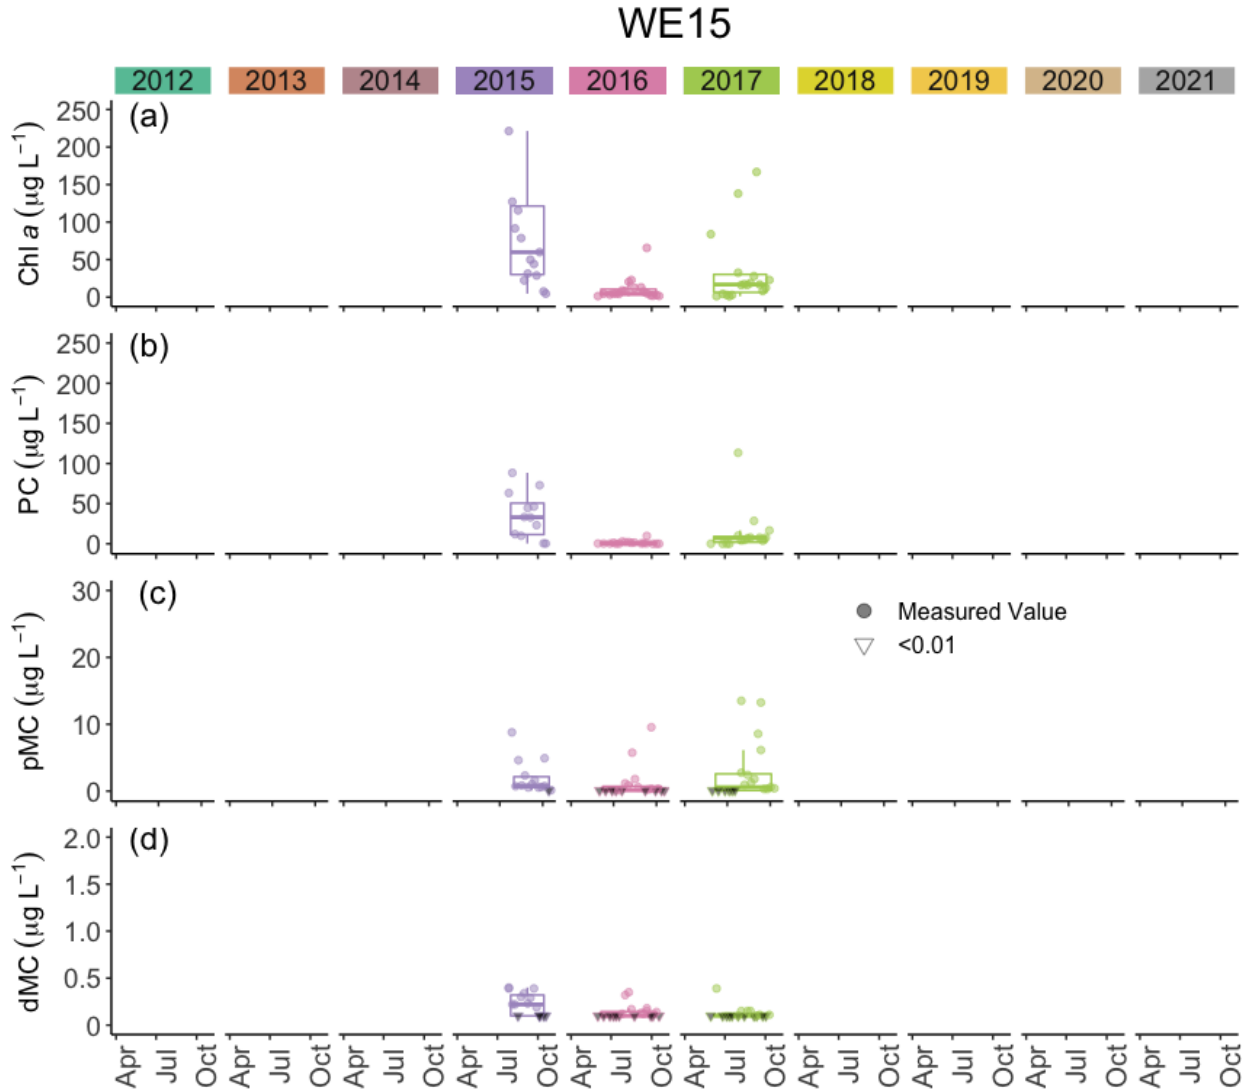

Figure S7. Concentrations of chlorophyll a (Chl a), phycocyanin (PC), particulate microcystins (pMC), and dissolved microcystins (dMC) at Station WE15 for all years sampled. Boxplots represent the median and 25% and 75% quartiles with whiskers extending to the highest or lowest point within 1.5x the interquartile range. A scatterplot is overlaid on the boxplots.

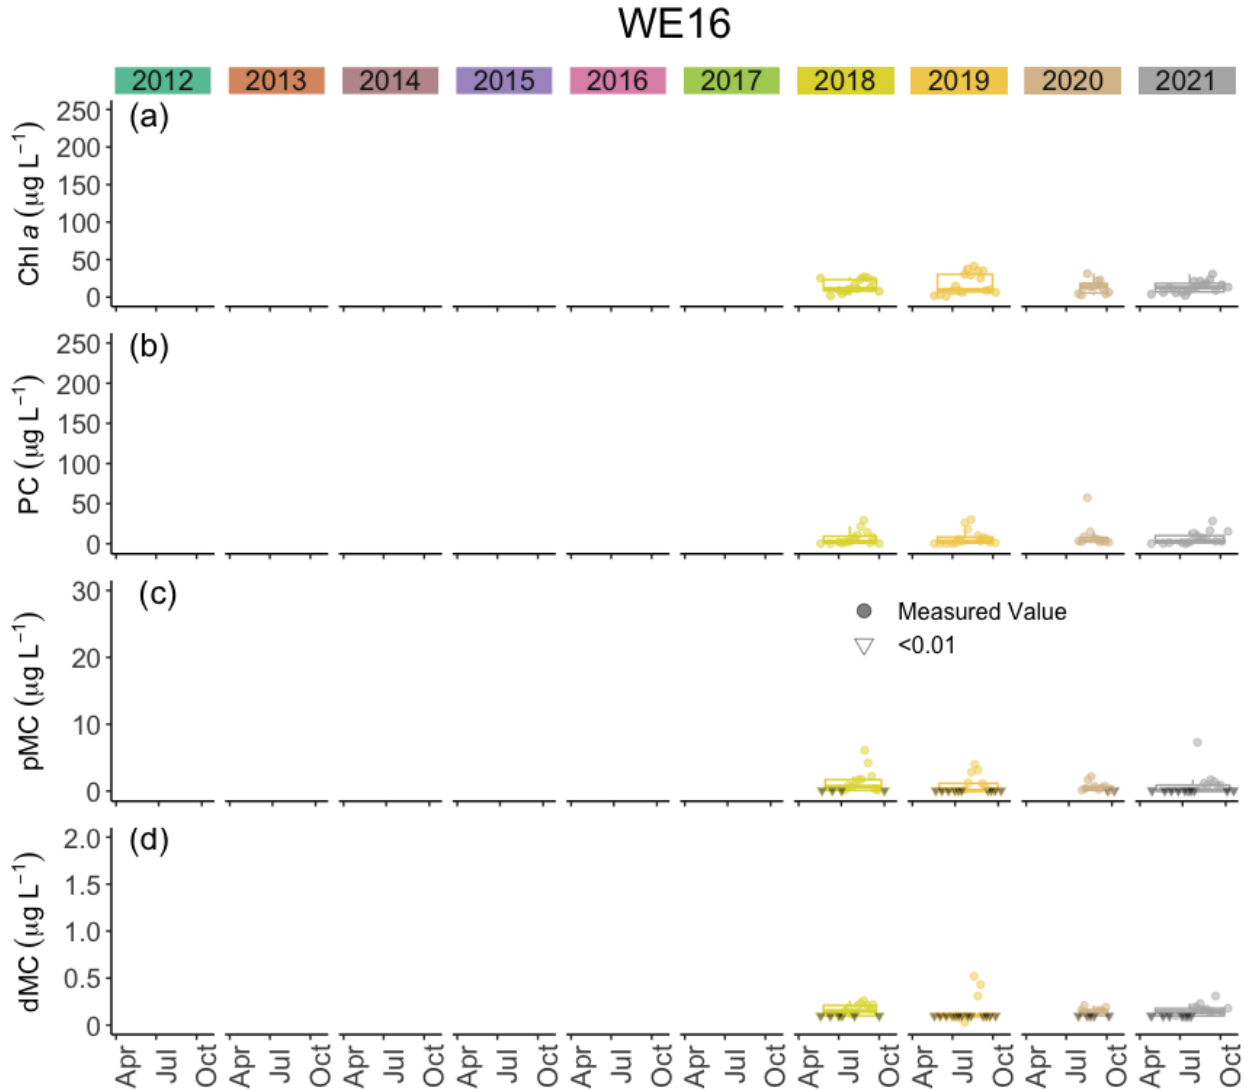

Figure S8. Concentrations of chlorophyll a (Chl a), phycocyanin (PC), particulate microcystins (pMC), and dissolved microcystins (dMC) at Station WE16 for all years sampled. Boxplots represent the median and 25% and 75% quartiles with whiskers extending to the highest or lowest point within 1.5x the interquartile range. A scatterplot is overlaid on the boxplots.

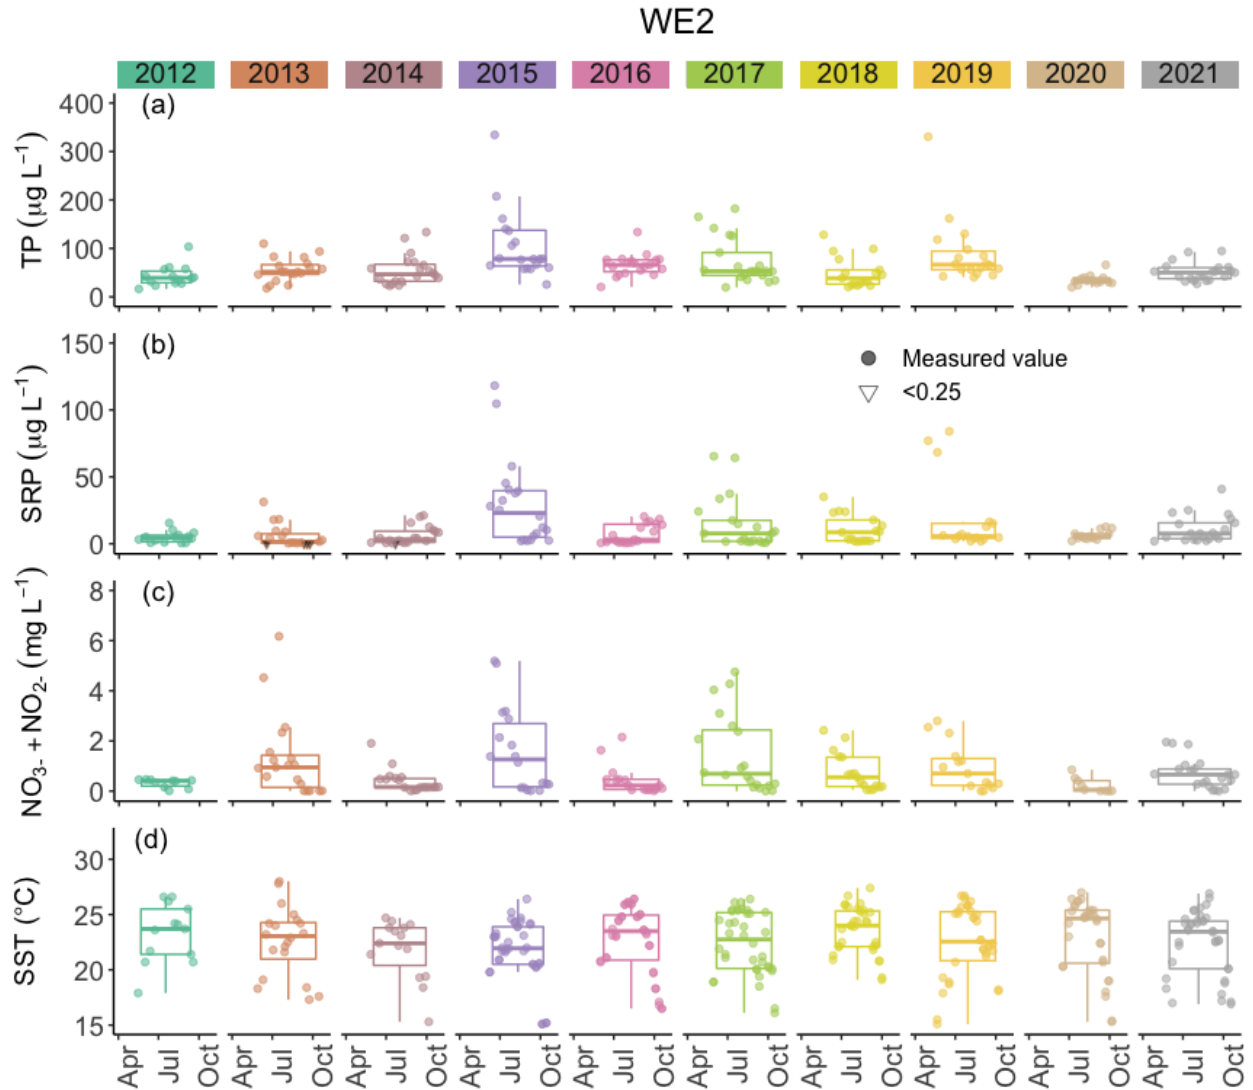

Figure S9. Concentrations of total phosphorus (TP), soluble reactive phosphorus (SRP), nitrate plus nitrite ( $\text{NO}_3^- + \text{NO}_2^-$ ), and sea surface temperature (SST) at Station WE02 for all years sampled. Boxplots represent the median and 25% and 75% quartiles with whiskers extending to the highest or lowest point within 1.5x the interquartile range. A scatterplot is overlaid on the boxplots.

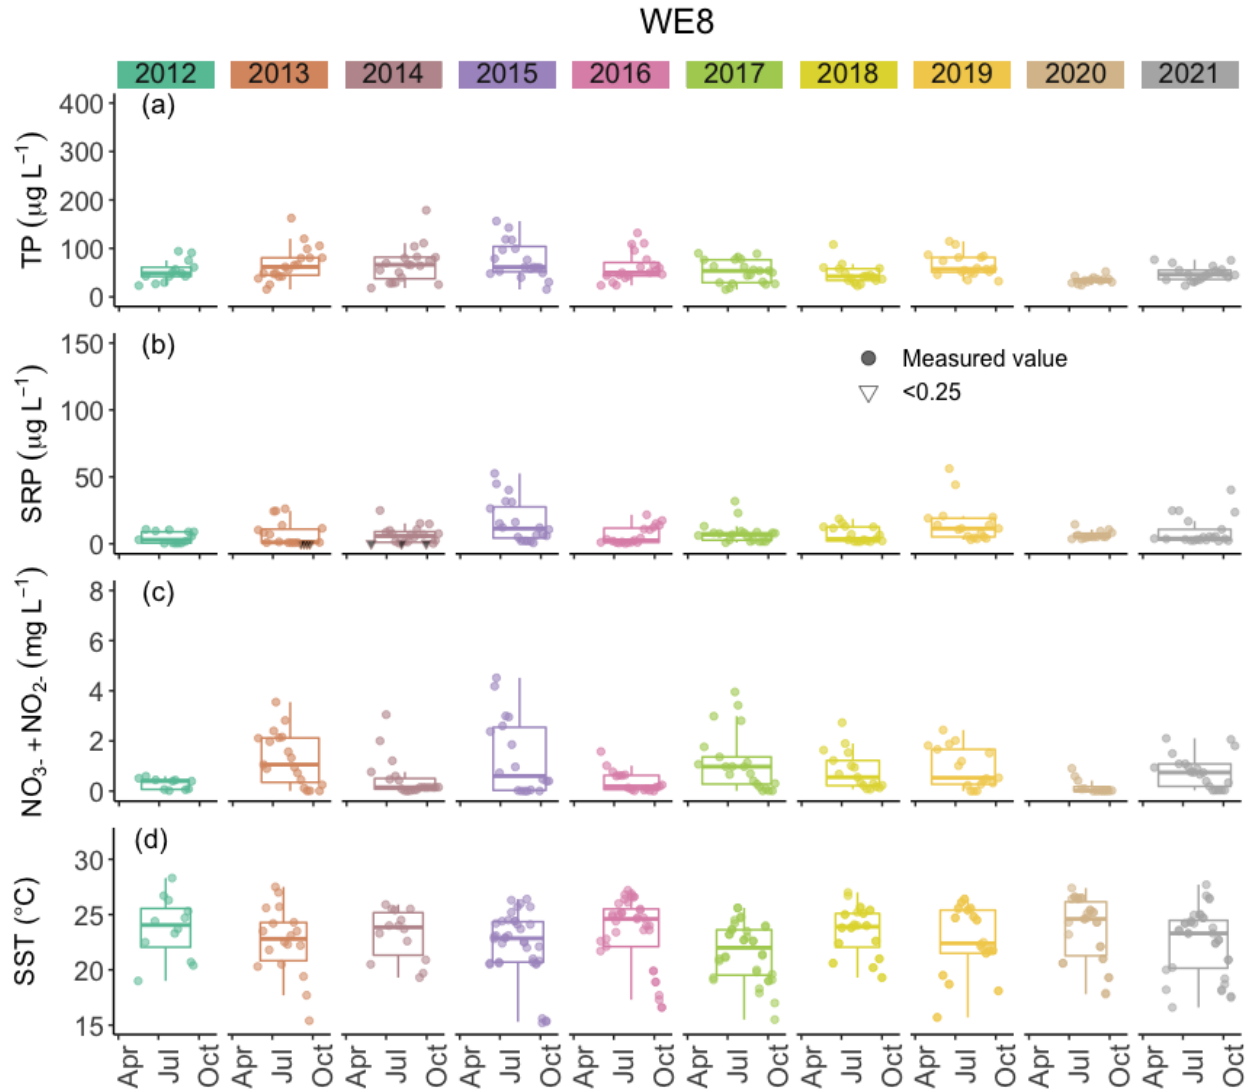

Figure S10. Concentrations of total phosphorus (TP), soluble reactive phosphorus (SRP), nitrate plus nitrite ( $\text{NO}_3^- + \text{NO}_2^-$ ), and sea surface temperature (SST) at Station WE08 for all years sampled. Boxplots represent the median and 25% and 75% quartiles with whiskers extending to the highest or lowest point within 1.5x the interquartile range. A scatterplot is overlaid on the boxplots.

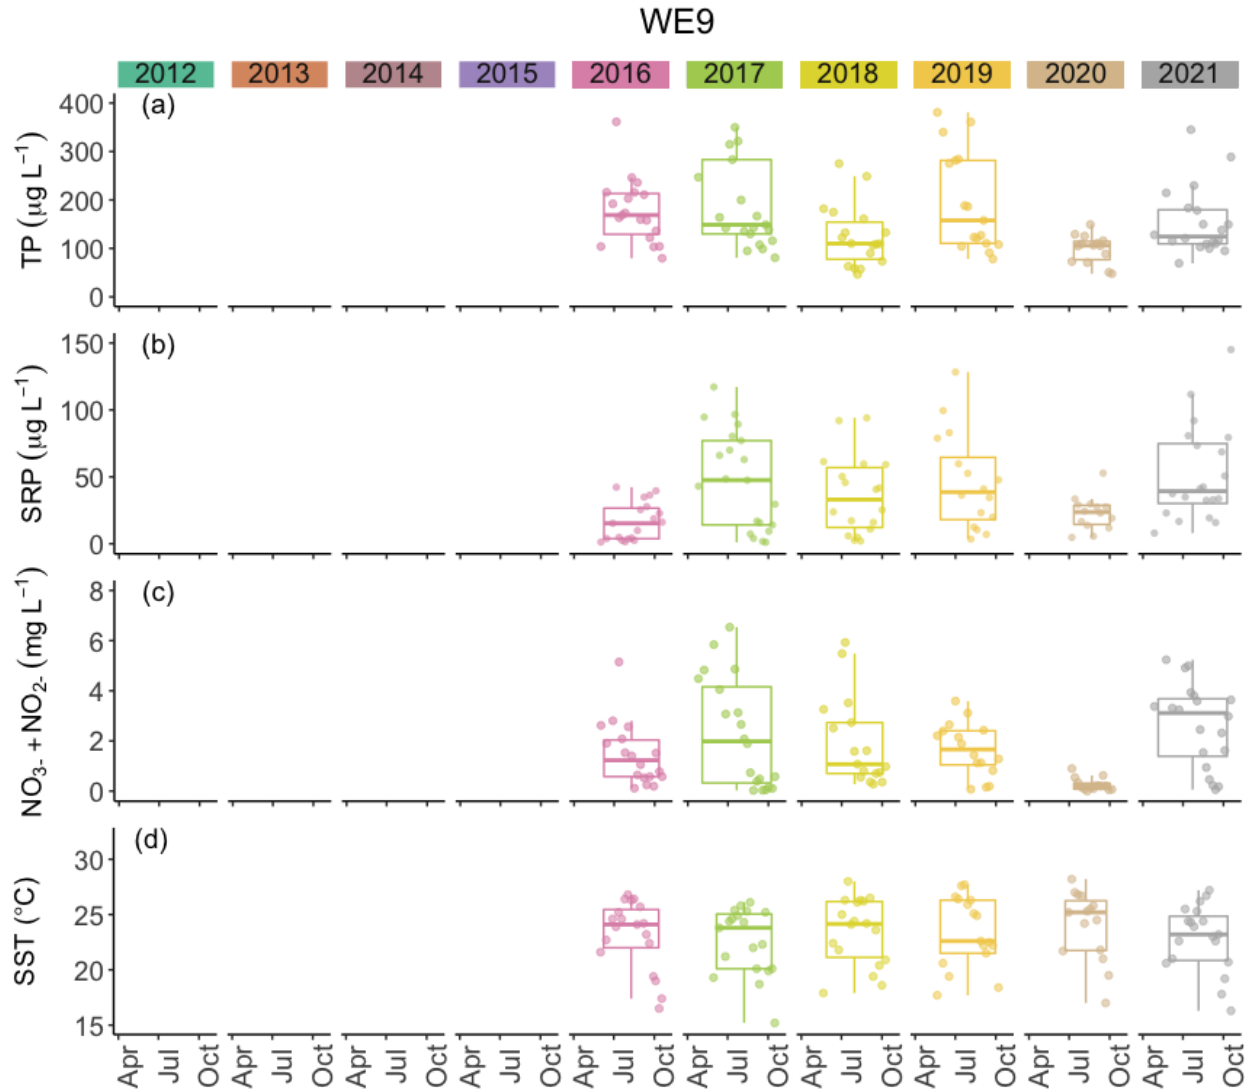

Figure S11. Concentrations of total phosphorus (TP), soluble reactive phosphorus (SRP), nitrate plus nitrite ( $\text{NO}_3^- + \text{NO}_2^-$ ), and sea surface temperature (SST) at Station WE09 for all years sampled. Boxplots represent the median and 25% and 75% quartiles with whiskers extending to the highest or lowest point within 1.5x the interquartile range. A scatterplot is overlaid on the boxplots.

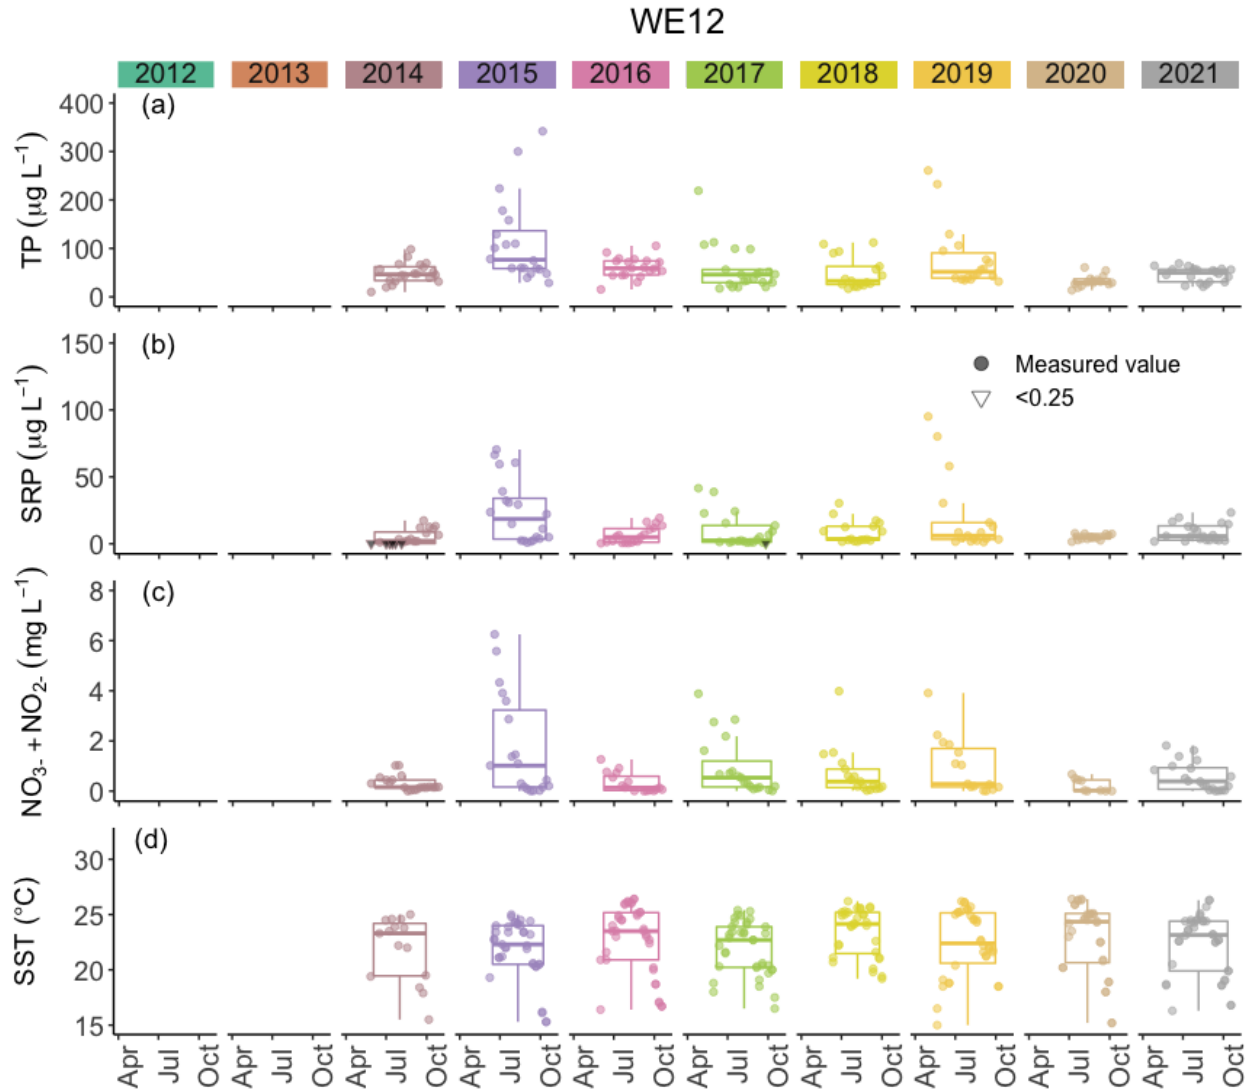

Figure S12. Concentrations of total phosphorus (TP), soluble reactive phosphorus (SRP), nitrate plus nitrite ( $\text{NO}_3^- + \text{NO}_2^-$ ), and sea surface temperature (SST) at Station WE12 for all years sampled. Boxplots represent the median and 25% and 75% quartiles with whiskers extending to the highest or lowest point within 1.5x the interquartile range. A scatterplot is overlaid on the boxplots.

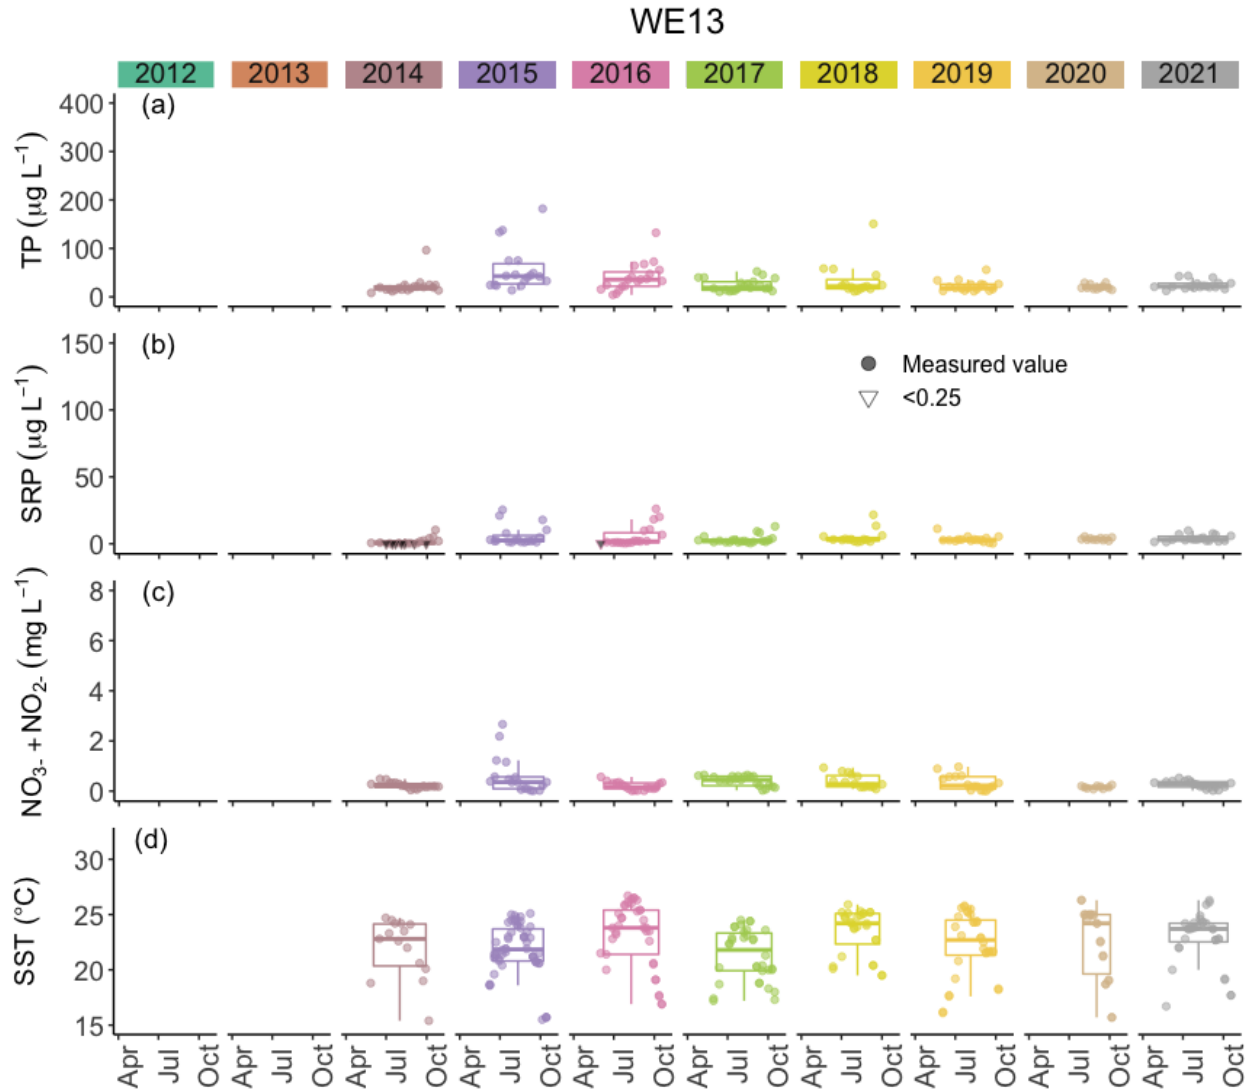

Figure S13. Concentrations of total phosphorus (TP), soluble reactive phosphorus (SRP), nitrate plus nitrite ( $\text{NO}_3^- + \text{NO}_2^-$ ), and sea surface temperature (SST) at Station WE13 for all years sampled. Boxplots represent the median and 25% and 75% quartiles with whiskers extending to the highest or lowest point within 1.5x the interquartile range. A scatterplot is overlaid on the boxplots.



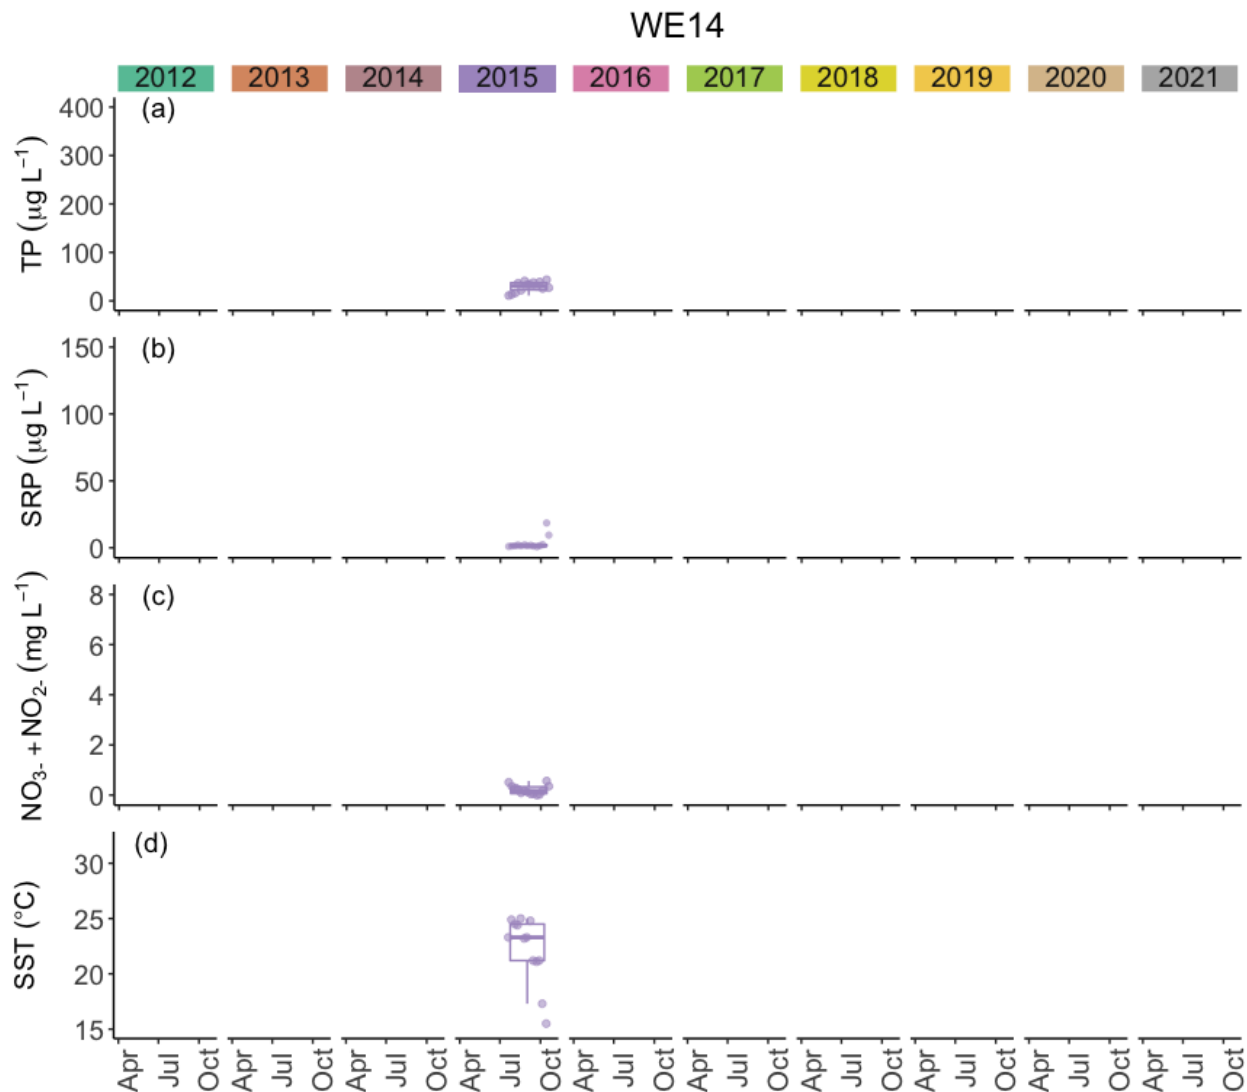

Figure S14. Concentrations of total phosphorus (TP), soluble reactive phosphorus (SRP), nitrate plus nitrite ( $\text{NO}_3^- + \text{NO}_2^-$ ), and sea surface temperature (SST) at Station WE14 for all years sampled. Boxplots represent the median and 25% and 75% quartiles with whiskers extending to the highest or lowest point within 1.5x the interquartile range. A scatterplot is overlaid on the boxplots.

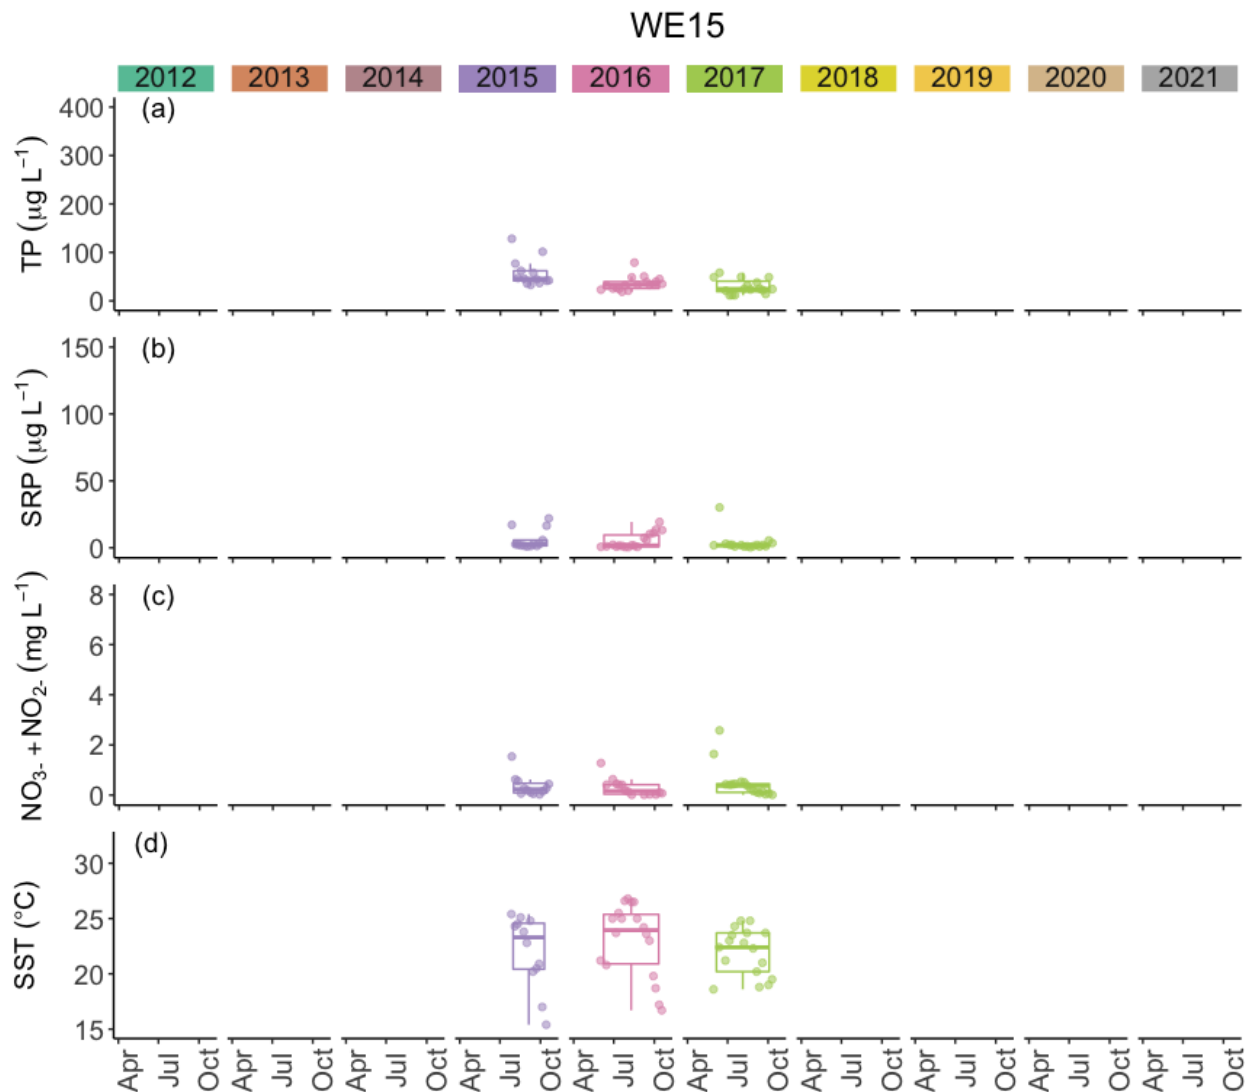

Figure S15. Concentrations of total phosphorus (TP), soluble reactive phosphorus (SRP), nitrate plus nitrite ( $\text{NO}_3^- + \text{NO}_2^-$ ), and sea surface temperature (SST) at Station WE15 for all years sampled. Boxplots represent the median and 25% and 75% quartiles with whiskers extending to the highest or lowest point within 1.5x the interquartile range. A scatterplot is overlaid on the boxplots.

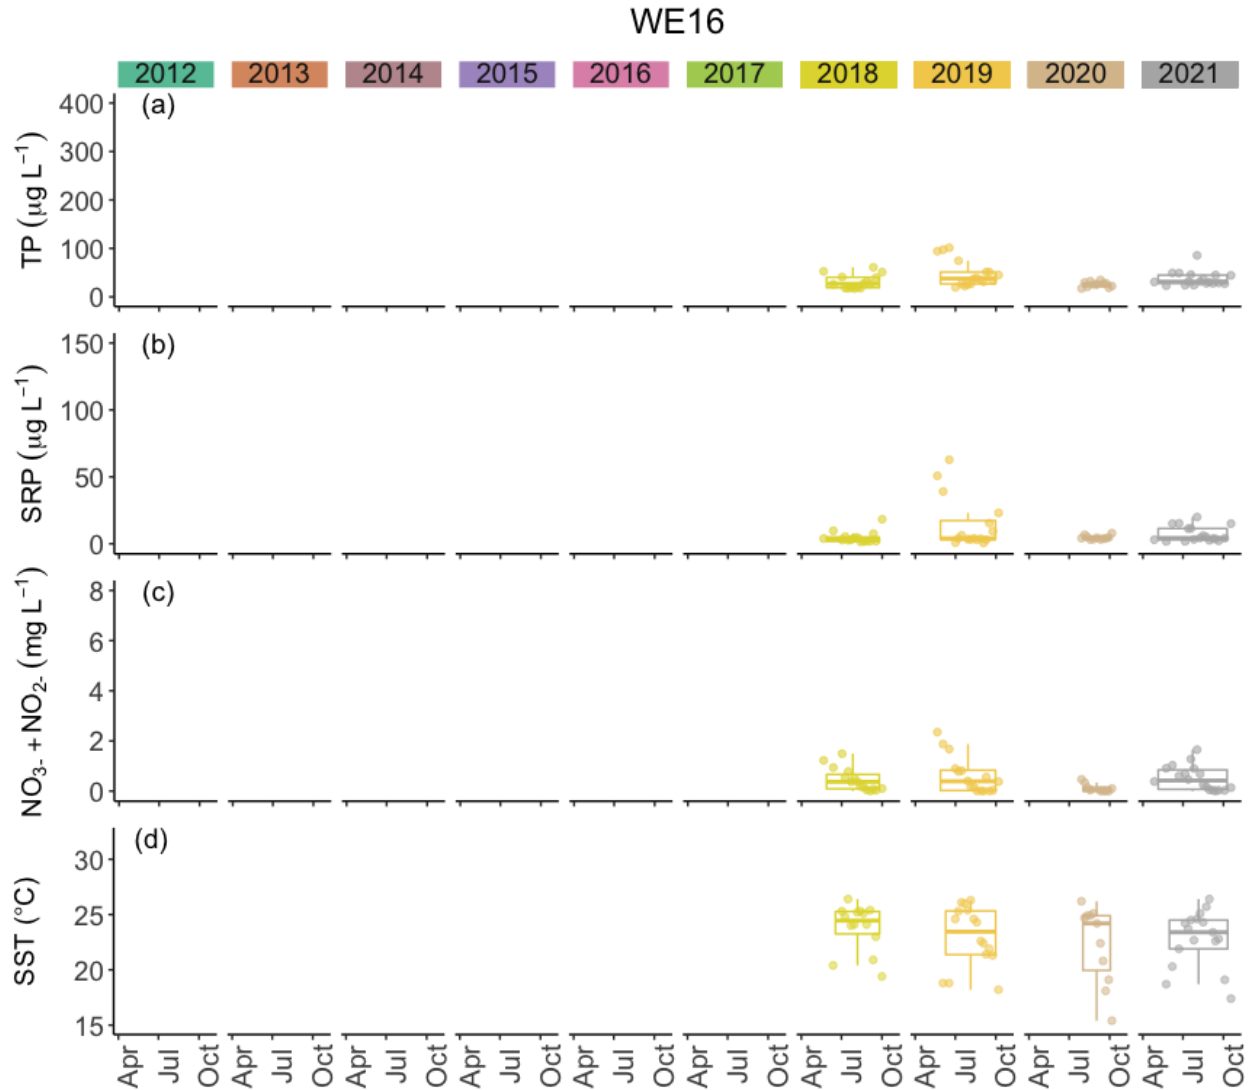

Figure S16. Concentrations of total phosphorus (TP), soluble reactive phosphorus (SRP), nitrate plus nitrite ( $\text{NO}_3^- + \text{NO}_2^-$ ), and sea surface temperature (SST) at Station WE16 for all years sampled. Boxplots represent the median and 25% and 75% quartiles with whiskers extending to the highest or lowest point within 1.5x the interquartile range. A scatterplot is overlaid on the boxplots.
